# Supplementary material for: Specific bone cells produce DLL4 to generate thymus-seeding progenitors from bone marrow
Source: PubMed Central journal article supplement — J Exp Med. 2015 May 4;212(5):759–74. doi: 10.1084/jem.20141843 (PMC4419348; doi:10.1084/jem.20141843), 2015-05-04
Supplement: supp_jem.20141843_JEM_20141843_sm.pdf [file supp_jem.20141843_JEM_20141843_sm.pdf]

SUPPLEMENTAL MATERIAL

Yu et al., <http://www.jem.org/cgi/content/full/jem.20141843/DC1>

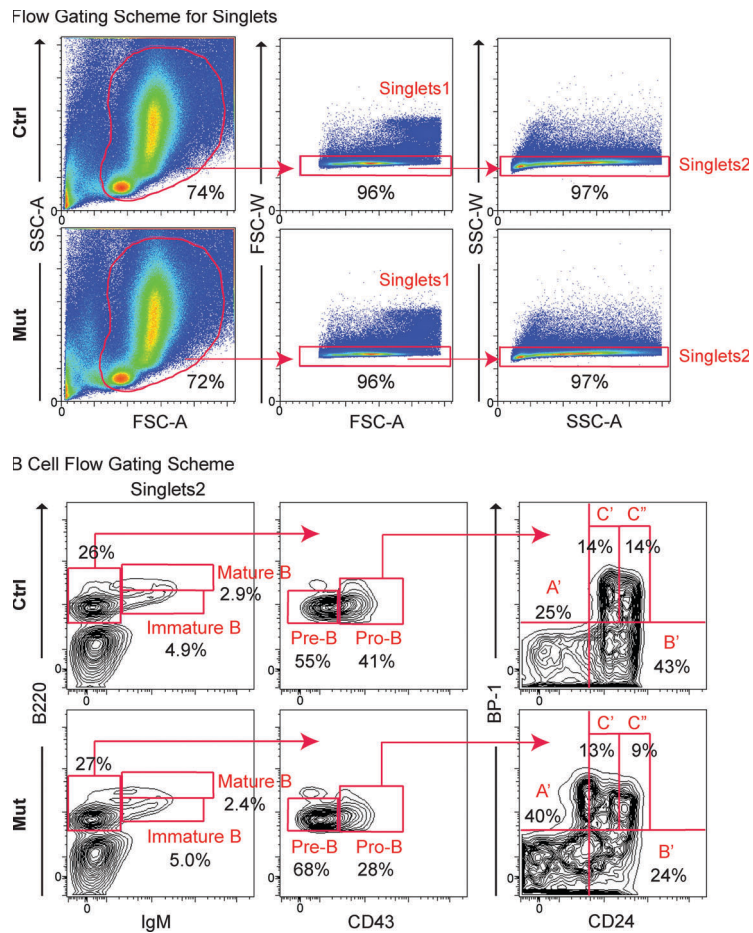

**Figure S1. Flow gating strategies for bone marrow singlets and B cells.** Flow gating strategy for singlet cells in the bone marrow of OcnCre;IDTR mutant and control littermates. Minimum 10 independent experiments;  $n = 30$ . Flow gating scheme of different stages of B progenitors and mature cells in the bone marrow of OcnCre;IDTR mutant and control littermates. Experiment performed twice independently;  $n = 5-6$ .

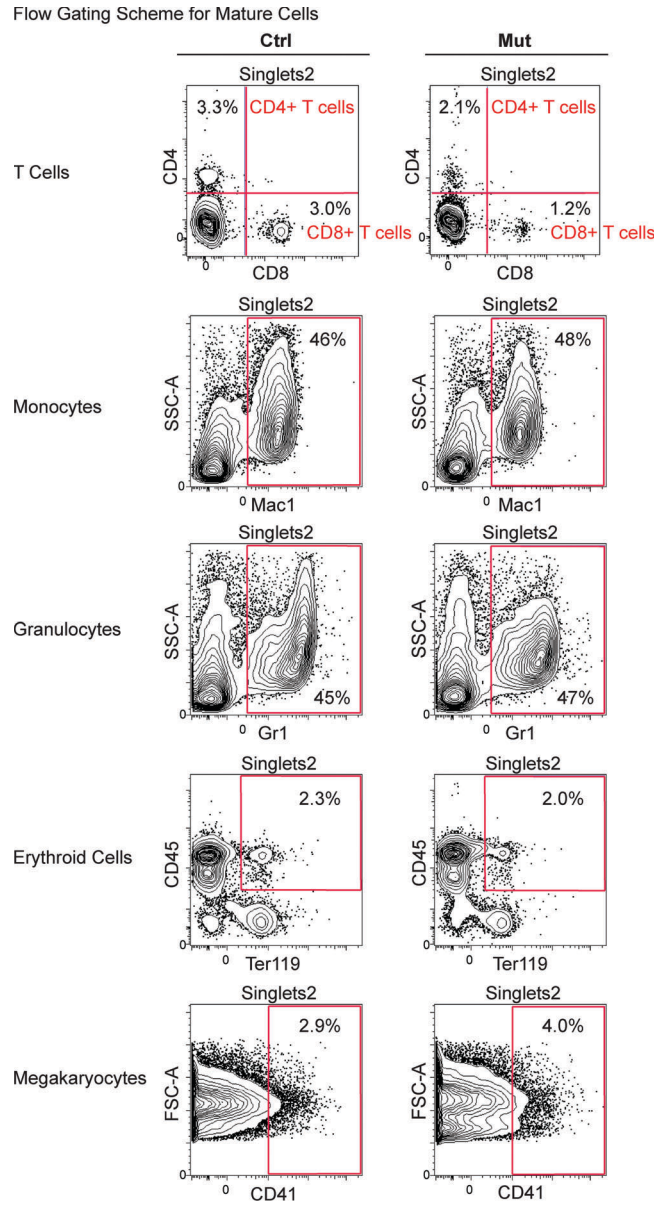

**Figure S2. Flow gating strategies for bone marrow T cells, monocytes, granulocytes, erythroid cells, and megakaryocytes.** Flow gating schemes for T cells, monocytes, granulocytes, erythroid cells, and megakaryocytes in the bone marrow of *OcnCre;DTR* mutant and control littermates. Minimum 3 independent experiments;  $n = 8-16$ .

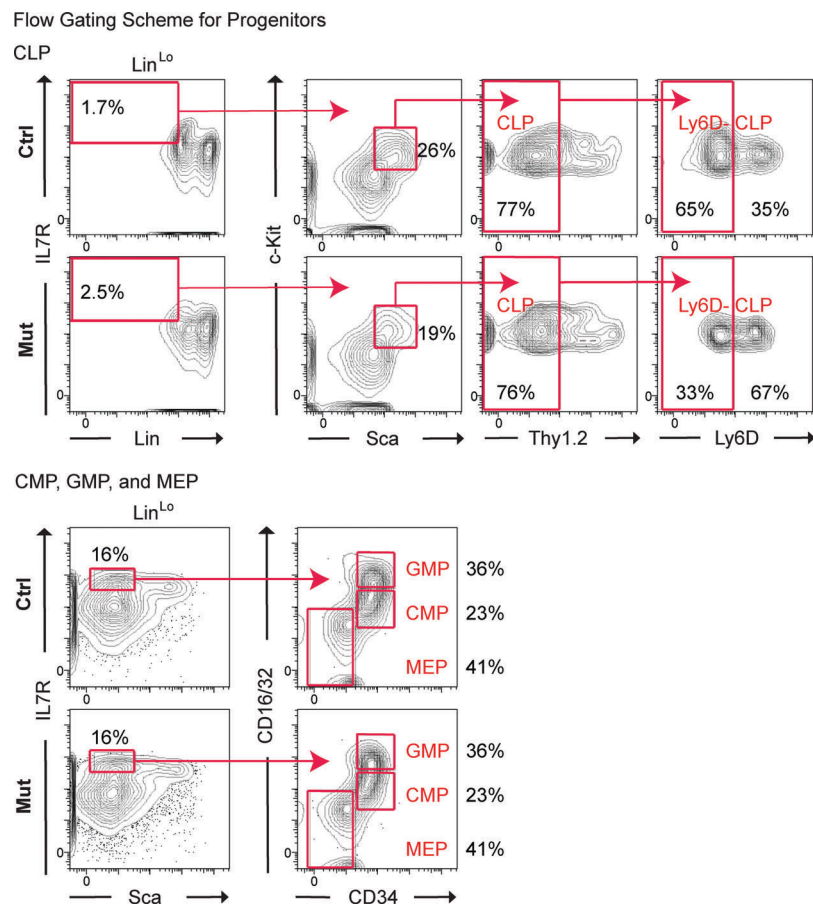

**Figure S3. Flow gating strategies for bone marrow hematopoietic progenitor cells.** Flow gating schemes for Ly6D<sup>-</sup>CLP, Ly6D<sup>+</sup>CLP, CMP, GMP, and MEP in the bone marrow of OcnCre;DTR mutant and control littermates. Minimum 3 independent experiments;  $n = 8-16$ .

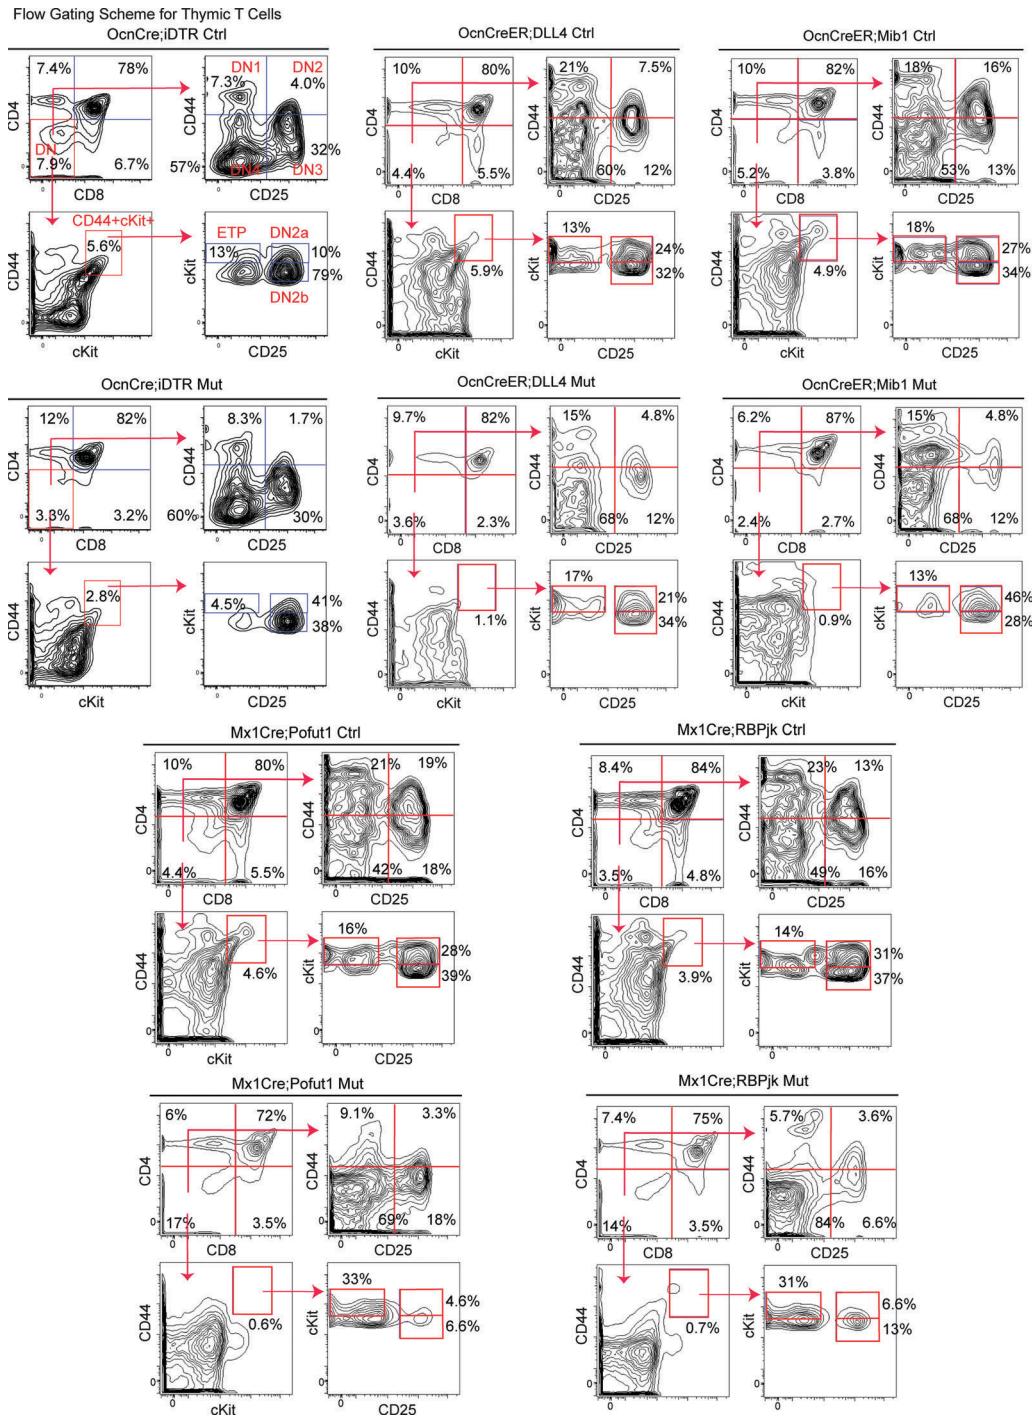

**Figure S4. Flow gating strategies for intrathymic T cells.** Flow gating schemes for thymic T cell intermediates in the mutant and control littermates of OcnCre;iDTR, OcnCreER;DLL4, OcnCreER;Mib1, Mx1Cre;Pofut1, and Mx1Cre;RBPjk strains. Minimum 2 independent experiments;  $n = 4-12$ .

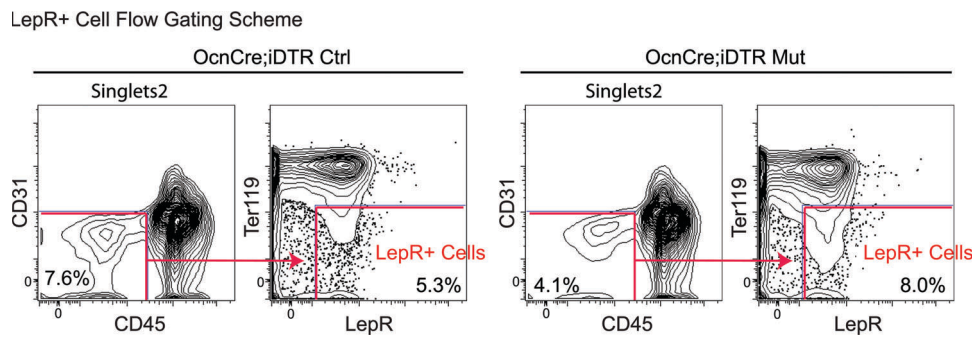

**Figure S5. Flow gating strategies for LepR<sup>+</sup> cells in the bone marrow stroma.** (A) Flow gating scheme for quantification of CD31<sup>-</sup>CD45<sup>-</sup>Ter119<sup>-</sup>LepR<sup>+</sup> cells in the bone marrow stroma of OcnCre<sup>+/-</sup>;iDTR mutants and controls. Three independent experiments;  $n = 6-7$ .
